# Supplementary material for: A neuronal ensemble encoding adaptive choice during sensory conflict in Drosophila
Source: PubMed Central journal article supplement (PMC8257655; doi:10.1038/s41467-021-24423-y), 2021-07-05
Supplement: 41467_2021_24423_MOESM1_ESM.pdf [file 41467_2021_24423_MOESM1_ESM.pdf]

1 **A neuronal ensemble encoding adaptive choice during sensory conflict in *Drosophila***

2 Preeti F. Sareen<sup>1</sup>, Li Yan McCurdy<sup>1,2</sup>, Michael N. Nitabach<sup>1,3,4,\*</sup>

3

4 <sup>1</sup>Department of Cellular and Molecular Physiology, Yale University, New Haven, CT, USA

5 <sup>2</sup>Interdepartmental Neuroscience Program, Yale University, New Haven, CT, USA

6 <sup>3</sup>Department of Genetics, Yale University, New Haven, CT, USA

7 <sup>4</sup>Department of Neuroscience, Yale University, New Haven, CT, USA

8

9 \*Corresponding author: michael.nitabach@yale.edu

10 **Supplementary Table 1**

11 Detailed statistics and sample size for data in main figures

| <b>Figure</b> | <b>Datasets compared</b>                       | <b>Statistics</b>                                            |
|---------------|------------------------------------------------|--------------------------------------------------------------|
| Fig. 1d       | $w^{1118}$ male vs. female Preference index    | Mixed-effects analysis,<br>F(9,118)=22.46,<br>p<0.0001       |
|               |                                                | Sidak's adjusted p:<br>(two-tailed)                          |
|               | 1mM male vs. female (n=10)                     | 0.9968                                                       |
|               | 10mM male vs. female (n=10)                    | >0.9999                                                      |
|               | 50mM male vs. female (n=20)                    | 0.1784                                                       |
|               | 100mM male vs. female (n=27)                   | 0.5552                                                       |
|               | 500mM male vs. female (n=10)                   | 0.8233                                                       |
| Fig. 1e       | $w^{1118}$ Preference index, Group size (n=77) | Pearson's $r^2=0.05655$ ,<br>p=0.0373 (two-tailed)           |
| Fig. 1f       | $w^{1118}$ Preference index, % ate (n=77)      | Pearson's $r^2=0.225$ ,<br>p<0.0001 (two-tailed)             |
| Fig. 1g       | $w^{1118}$ % ate, Group size (n=77)            | Pearson's $r^2=0.0006$ ,<br>p=0.8313 (two-tailed)            |
| Fig. 1h       | $w^{1118}$ Preference index, Group size, % ate | Multiple linear<br>regression,<br>F(3,73)=9.393,<br>p<0.0001 |

|         |                                                                     |                                                |
|---------|---------------------------------------------------------------------|------------------------------------------------|
|         |                                                                     | $r^2=0.278$                                    |
| Fig. 2a | Optogenetic Screen 20XUAS-Chrimson (Chr)<br>empty>Chr (n=30)        | One-way ANOVA,<br>F(40,358)=5.397,<br>p<0.0001 |
|         |                                                                     | Dunnett's adjusted p:<br>(two-tailed)          |
|         | empty>Chr vs. Akh>Chr (n=10)                                        | 0.9996                                         |
|         | <b>empty&gt;Chr vs. AstA&gt;Chr (n=10)</b>                          | <b>&lt;0.0001</b>                              |
|         | empty>Chr vs. Crz>Chr (n=10)                                        | 0.9990                                         |
|         | empty>Chr vs. DH44>Chr (n=10)                                       | 0.1302                                         |
|         | empty>Chr vs. Lk>Chr (n=10)                                         | 0.9997                                         |
|         | <b>empty&gt;Chr vs. NPF&gt;Chr (n=10)</b>                           | <b>&lt;0.0001</b>                              |
|         | empty>Chr vs. Proctolin>Chr (n=10)                                  | 0.9997                                         |
|         | empty>Chr vs. sNPF>Chr (n=10)                                       | 0.9983                                         |
|         | empty>Chr vs. Tk>Chr (n=10)                                         | 0.9993                                         |
|         | empty>Chr vs. TH>Chr (n=10)                                         | 0.9983                                         |
|         | empty>Chr vs. PPL1 (504B)>Chr (n=10)                                | 0.9998                                         |
|         | empty>Chr vs. PPL1 (65B)>Chr (n=10)                                 | 0.9996                                         |
|         | empty>Chr vs. PAM (58E02)>Chr (n=10)                                | 0.9993                                         |
|         | empty>Chr vs. OA/TA Tdc>Chr (n=10)                                  | >0.9999                                        |
|         | empty>Chr vs. Ser/Trh>Chr (n=10)                                    | 0.9997                                         |
|         | <b>empty&gt;Chr vs. <math>\gamma 2\alpha'1</math>&gt;Chr (n=10)</b> | <b>&lt;0.0001</b>                              |

|                                                                |               |
|----------------------------------------------------------------|---------------|
| empty>Chr vs. $\alpha_3$ >Chr (n=10)                           | 0.8644        |
| empty>Chr vs. $\gamma_1$ -pedc>Chr (n=10)                      | 0.9986        |
| empty>Chr vs. $\alpha'^2\alpha_2$ >Chr (n=10)                  | 0.9997        |
| empty>Chr vs. $\alpha'^2\alpha_2,\gamma_2\alpha'1$ >Chr (n=10) | 0.9995        |
| <b>empty&gt;Chr vs. <math>\alpha_1</math>&gt;Chr (n=10)</b>    | <b>0.0070</b> |
| empty>Chr vs. $\beta_1$ >Chr (n=10)                            | 0.1241        |
| empty>Chr vs. $\beta_1\beta_2$ >Chr (n=10)                     | 0.9924        |
| empty>Chr vs. $\gamma_5$ >Chr (n=10)                           | 0.9997        |
| empty>Chr vs. $\beta'^2a$ >Chr (n=6)                           | 0.9983        |
| empty>Chr vs. $\gamma_4,\gamma_4<\gamma_1\gamma_2$ >Chr (n=10) | 0.9982        |
| empty>Chr vs. $\gamma_3$ >Chr (n=10)                           | 0.9990        |
| empty>Chr vs. allKC 10B>Chr (n=10)                             | 0.9988        |
| empty>Chr vs. $\alpha/\beta$ 8B>Chr (n=8)                      | 0.9988        |
| empty>Chr vs. $\alpha/\beta$ c739>Chr (n=10)                   | 0.9988        |
| empty>Chr vs. $\alpha'/\beta'$ 5B>Chr (n=10)                   | 0.9997        |
| empty>Chr vs. $\gamma$ -m 131B>Chr (n=8)                       | 0.3762        |
| empty>Chr vs. FB14,6 ss20>Chr (n=15)                           | 0.9997        |
| empty>Chr vs. FB13,4,6 ss208>Chr (n=10)                        | 0.9990        |
| empty>Chr vs. FB13,4,6 ss225>Chr (n=10)                        | 0.9993        |
| empty>Chr vs. FB16 c205>Chr (n=10)                             | 0.9777        |
| empty>Chr vs. FB12,8,9 R89E07>Chr (n=10)                       | 0.6555        |
| empty>Chr vs. FB15,8,9 R38E07>Chr (n=10)                       | 0.9994        |

|         |                                                            |                                                |
|---------|------------------------------------------------------------|------------------------------------------------|
|         | empty>Chr vs. ventral FB R58F03>Chr (n=10)                 | 0.3548                                         |
|         | empty>Chr vs. FB11,2 R52G12>Chr (n=10)                     | 0.9987                                         |
| Fig. 2a | Optogenetic Screen 20XUAS-GtACR1 (Gt)<br>empty>Gt (n=30)   | One-way ANOVA,<br>F(10,129)=7.719,<br>p<0.0001 |
|         |                                                            | Dunnett's adjusted p:<br>(two-tailed)          |
|         | <b>empty&gt;Gt vs. AstA&gt;Gt (n=10)</b>                   | <b>0.0004</b>                                  |
|         | <b>empty&gt;Gt vs. DH44&gt;Gt (n=10)</b>                   | <b>0.0023</b>                                  |
|         | <b>empty&gt;Gt vs. Lk&gt;Gt (n=10)</b>                     | <b>0.0081</b>                                  |
|         | empty>Gt vs. NPF>Gt (n=10)                                 | 0.4307                                         |
|         | empty>Gt vs. $\gamma 2\alpha'1$ >Gt (n=10)                 | >0.9999                                        |
|         | <b>empty&gt;Gt vs. <math>\alpha 3</math>&gt;Gt1 (n=10)</b> | <b>&lt;0.0001</b>                              |
|         | empty>Gt vs. $\alpha 1$ >Gt (n=10)                         | 0.9628                                         |
|         | empty>Gt vs. $\beta 1$ >Gt (n=10)                          | 0.9996                                         |
|         | <b>empty&gt;Gt vs. FB16 c205&gt;Gt (n=10)</b>              | <b>0.0002</b>                                  |
|         | empty>Gt vs. FB12,8,9 89E07>Gt (n=20)                      | 0.2042                                         |
| Fig. 2b | Lk (left panel)                                            | One-way ANOVA,<br>F(4,84)=8.136,<br>p<0.0001   |
|         |                                                            | Sidak's adjusted p:<br>(two-tailed)            |

|         |                                                                                                                                                                                                                                                                                                                                      |                                                                              |
|---------|--------------------------------------------------------------------------------------------------------------------------------------------------------------------------------------------------------------------------------------------------------------------------------------------------------------------------------------|------------------------------------------------------------------------------|
|         | empty>Chr (n=10) vs. Lk>Chr (n=20)                                                                                                                                                                                                                                                                                                   | 0.2664                                                                       |
|         | empty>Chr (n=10) vs. Lk>UAS-Chr;UAS-DH44 <sup>RNAi</sup> (n=30)                                                                                                                                                                                                                                                                      | 0.3550<br><b>0.0005</b>                                                      |
|         | <b>empty&gt;Gt (n=10) vs. Lk&gt;Gt (n=19)</b>                                                                                                                                                                                                                                                                                        |                                                                              |
| Fig. 2b | Lk (right panel)<br>RNAi ctrl = Lk-GAL4>UAS-Valium (n=20)                                                                                                                                                                                                                                                                            | One-way ANOVA,<br>F(7,106)=1.973,<br>p=0.0655                                |
|         | RNAi ctrl vs. AstA-R1 <sup>RNAi</sup> (n=14)<br>RNAi ctrl vs. DH44-R1 <sup>RNAi</sup> (n=10)<br>RNAi ctrl vs. NPFR <sup>RNAi</sup> (n=10)<br>RNAi ctrl vs. Dop1R1 <sup>RNAi</sup> (n=20)<br>RNAi ctrl vs. Dop1R2 <sup>RNAi</sup> (n=10)<br>RNAi ctrl vs. Dop2R <sup>RNAi</sup> (n=20)<br>RNAi ctrl vs. DopEcR <sup>RNAi</sup> (n=10) | Multiple comparisons<br>not carried out since<br>ANOVA is not<br>significant |
| Fig. 2c | AstA (left panel)                                                                                                                                                                                                                                                                                                                    | One-way ANOVA,<br>F(4,75)=61.57,<br>p<0.0001                                 |
|         |                                                                                                                                                                                                                                                                                                                                      | Sidak's adjusted p:<br>(two-tailed)                                          |
|         | <b>empty&gt;Chr (n=10) vs. Chr (n=20)</b>                                                                                                                                                                                                                                                                                            | <b>&lt;0.0001</b>                                                            |
|         | empty>Chr (n=10) vs. AstA>UAS-Chr;UAS-AstA <sup>RNAi</sup> (n=20)                                                                                                                                                                                                                                                                    | 0.9814<br><b>&lt;0.0001</b>                                                  |
|         | <b>empty&gt;Gt (n=10) vs. AstA&gt;Gt (n=20)</b>                                                                                                                                                                                                                                                                                      |                                                                              |

|         |                                                                    |                                              |
|---------|--------------------------------------------------------------------|----------------------------------------------|
| Fig. 2c | AstA (right panel)<br>RNAi ctrl = AstA-GAL4>UAS-Valium (n=20)      | One-way ANOVA,<br>F(7,90)=4.368,<br>p=0.0003 |
|         |                                                                    | Dunnett's adjusted p:<br>(two-tailed)        |
|         | RNAi ctrl vs. DH44-R1 <sup>RNAi</sup> (n=10)                       | 0.9530                                       |
|         | RNAi ctrl vs. Lkr <sup>RNAi</sup> (n=5)                            | 0.2010                                       |
|         | RNAi ctrl vs. NPFR <sup>RNAi</sup> (n=13)                          | 0.5986                                       |
|         | <b>RNAi ctrl vs. Dop1R1<sup>RNAi</sup> (n=20)</b>                  | <b>0.0005</b>                                |
|         | RNAi ctrl vs. Dop1R2 <sup>RNAi</sup> (n=10)                        | 0.9998                                       |
|         | RNAi ctrl vs. Dop2R <sup>RNAi</sup> (n=10)                         | 0.9979                                       |
|         | RNAi ctrl vs. DopEcR <sup>RNAi</sup> (n=10)                        | 0.9975                                       |
| Fig. 2d | NPF (left panel)                                                   | One-way ANOVA,<br>F(5,89)=11.81,<br>p<0.0001 |
|         |                                                                    | Sidak's adjusted p:<br>(two-tailed)          |
|         | <b>empty&gt;Chr (n=10) vs. NPF&gt;Chr (n=20)</b>                   | <b>0.0002</b>                                |
|         | empty>Chr (n=10) vs. NPF>UAS-Chr;UAS-NPF <sup>RNAi</sup><br>(n=25) | 0.9855<br>0.1928                             |
|         | empty>Gt (n=10) vs. NPF>Gt (n=20)                                  |                                              |

|         |                                                                   |                                               |
|---------|-------------------------------------------------------------------|-----------------------------------------------|
| Fig. 2d | NPF (right panel)<br>RNAi ctrl = NPF-GAL4>UAS-Valium (n=20)       | One-way ANOVA,<br>F(7,127)=3.657,<br>p=0.0012 |
|         |                                                                   | Dunnett's adjusted p:<br>(two-tailed)         |
|         | RNAi ctrl vs. AstA-R1 <sup>RNAi</sup> (n=15)                      | 0.4148                                        |
|         | RNAi ctrl vs. DH44-R1 <sup>RNAi</sup> (n=10)                      | 0.9972                                        |
|         | <b>RNAi ctrl vs. Lkr<sup>RNAi</sup> (n=20)</b>                    | <b>0.0188</b>                                 |
|         | <b>RNAi ctrl vs. Dop1R1<sup>RNAi</sup> (n=20)</b>                 | <b>0.0026</b>                                 |
|         | RNAi ctrl vs. Dop1R2 <sup>RNAi</sup> (n=20)                       | 0.1588                                        |
|         | RNAi ctrl vs. Dop2R <sup>RNAi</sup> (n=20)                        | 0.9212                                        |
|         | RNAi ctrl vs. DopEcR <sup>RNAi</sup> (n=10)                       | 0.9910                                        |
| Fig. 2e | DH44 (left panel)                                                 | One-way ANOVA,<br>F(4,75)=10.54,<br>p<0.0001  |
|         |                                                                   | Sidak's adjusted p:<br>(two-tailed)           |
|         | empty>Chr (n=10) vs. DH44>Chr (n=20)                              | 0.1591                                        |
|         | empty>Chr (n=10) vs. DH44>UAS-Chr;UAS-DH44 <sup>RNAi</sup> (n=20) | 0.9807                                        |
|         | <b>empty&gt;Gt (n=10) vs. DH44&gt;Gt (n=20)</b>                   | <b>&lt;0.0001</b>                             |



|                                                               |                                                               |                                                |
|---------------------------------------------------------------|---------------------------------------------------------------|------------------------------------------------|
| Fig. 2e                                                       | DH44 (right panel)<br>RNAi ctrl = DH44-GAL4>UAS-Valium (n=20) | One-way ANOVA,<br>F(7,141)=5.56,<br>p<0.0001   |
|                                                               |                                                               | Dunnett's adjusted p:<br>(two-tailed)          |
|                                                               | RNAi ctrl vs. DH44>AstA-R1 <sup>RNAi</sup> (n=20)             | 0.7806                                         |
|                                                               | RNAi ctrl vs. DH44>Lkr <sup>RNAi</sup> (n=20)                 | 0.6273                                         |
|                                                               | RNAi ctrl vs. DH44>NPFR <sup>RNAi</sup> (n=19)                | 0.9997                                         |
|                                                               | RNAi ctrl vs. DH44>Dop1R1 <sup>RNAi</sup> (n=20)              | 0.9998                                         |
|                                                               | RNAi ctrl vs. DH44>Dop1R2 <sup>RNAi</sup> (n=10)              | 0.9996                                         |
| RNAi ctrl vs. DH44>Dop2R <sup>RNAi</sup> (n=20)               | 0.9952                                                        |                                                |
| <b>RNAi ctrl vs. DH44&gt;DopEcR<sup>RNAi</sup> (n=20)</b>     | <b>0.0001</b>                                                 |                                                |
| Fig. 3a                                                       | c205 (left panel)                                             | One-way ANOVA,<br>F(14,318)=3.315,<br>p<0.0001 |
|                                                               |                                                               | Sidak's adjusted p:<br>(two-tailed)            |
|                                                               | empty>Chr (n=26) vs. c205>Chr (n=45)                          | 0.2150                                         |
|                                                               | <b>empty&gt;Gt (n=20) vs. c205&gt;Gt (n=20)</b>               | <b>&lt;0.0001</b>                              |
|                                                               | empty>Gt (n=20) vs. 84C10>GAL80+c205>Gt (n=10)                | 0.7195                                         |
| <b>c205&gt;Gt (n=20) vs. 84C10&gt;GAL80+c205&gt;Gt (n=10)</b> | <b>0.0008</b>                                                 |                                                |
| c205 (right panel)<br>RNAi ctrl = c205-GAL4>UAS-Valium (n=47) | Kruskal-Wallis<br>stat=40.85, p<0.0001                        |                                                |

|         |                                                    |                                        |
|---------|----------------------------------------------------|----------------------------------------|
|         |                                                    | Dunn's adjusted p:<br>(two-tailed)     |
|         | RNAi ctrl vs. AstA <sup>RNAi</sup> (n=20)          | 0.2550                                 |
|         | <b>RNAi ctrl vs. AstA-R1<sup>RNAi</sup> (n=20)</b> | <b>0.0131</b>                          |
|         | RNAi ctrl vs. DH44 <sup>RNAi</sup> (n=20)          | 0.1245                                 |
|         | <b>RNAi ctrl vs. DH44-R1<sup>RNAi</sup> (n=20)</b> | <b>0.0001</b>                          |
|         | RNAi ctrl vs. Lk <sup>RNAi</sup> (n=20)            | 0.9999                                 |
|         | <b>RNAi ctrl vs. Lkr<sup>RNAi</sup> (n=20)</b>     | <b>0.0011</b>                          |
|         | RNAi ctrl vs. NPF <sup>RNAi</sup> (n=20)           | 0.9999                                 |
|         | RNAi ctrl vs. NPF <sup>RNAi</sup> (n=40)           | 0.9999                                 |
|         | RNAi ctrl vs. Dop1R1 <sup>RNAi</sup> (n=20)        | 0.9999                                 |
|         | RNAi ctrl vs. Dop1R2 <sup>RNAi</sup> (n=20)        | 0.9999                                 |
|         | RNAi ctrl vs. Dop2R <sup>RNAi</sup> (n=20)         | 0.6954                                 |
|         | RNAi ctrl vs. DopEcR <sup>RNAi</sup> (n=31)        | 0.9999                                 |
| Fig. 3b | c205 % ate                                         | Kruskal-Wallis<br>stat=49.98, p<0.0001 |
|         |                                                    | Dunn's adjusted p:<br>(two-tailed)     |
|         | <b>c205&gt;Chr deprived (n=29) vs. fed (n=10)</b>  | <b>&lt;0.0001</b>                      |
|         | <b>c205&gt;Gt deprived (n=20) vs. fed (n=10)</b>   | <b>&lt;0.0001</b>                      |
| Fig. 3c | Food intake<br>empty>Chr (n=10) c205>Chr (n=8)     | Kruskal-Wallis<br>stat=3.022, p=0.6966 |

|         |                                                                                |                                                             |
|---------|--------------------------------------------------------------------------------|-------------------------------------------------------------|
| Fig. 3d | Food intake<br>empty>Gt (n=7), c205>Gt (n=7)                                   | Kruskal-Wallis<br>stat=4.189, p=0.5225                      |
| Fig. 3e | Place PI<br>empty>Chr (n=8), c205>Chr (n=20)<br>empty>Gt (n=7), c205>Gt (n=8)  | One-way ANOVA,<br>F(3,39)=2.284, p=0.094                    |
| Fig. 4d | 84C10 Peak $\Delta R/R_0$                                                      | Kruskal-Wallis<br>stat=37.79, p<0.0001                      |
|         |                                                                                | Two-tailed Wilcoxon<br>matched-pairs or Paired<br>t test p: |
|         | <b>naïveDeprived sweet vs. naïveDeprived bittersweet</b><br>(n=10)             | <b>0.0488</b>                                               |
|         | naïveFed sweet vs. naïveFed bittersweet (n=12)                                 | 0.9821 (t=0.02289,df=11)                                    |
|         | <b>choseSweet sweet vs. choseSweet bittersweet</b> (n=8)                       | <b>0.0078</b>                                               |
|         | <b>choseBittersweet sweet vs. choseBittersweet</b><br><b>bittersweet</b> (n=9) | <b>0.0043</b> (t=3.937,df=8)                                |
|         | choseNeither sweet vs. choseNeither bittersweet (n=10)                         | 0.7755 (t=0.2939, df=9)                                     |
| Fig. 5a | Preference index                                                               | One-way ANOVA<br>F(3,30)=9.21, p=0.0002                     |
|         |                                                                                | Sidak's adjusted p:<br>(two-tailed)                         |
|         | <b>c205&gt;w1118 deprived</b> (n=6) vs. <b>c205&gt;Gt</b> (n=12)               | <b>0.0095</b>                                               |
|         | <b>84C10&gt;w1118 deprived</b> (n=6) vs. <b>84C10&gt;Gt</b> (n=10)             | <b>0.0014</b>                                               |

12 **Supplementary Table 2**

13 Source for all fly genotypes used

| <b>Figure</b> | <b>Genotype</b>                                    | <b>Source</b>                                         |
|---------------|----------------------------------------------------|-------------------------------------------------------|
| Fig. 2, 3     | empty = Empty split-GAL4                           | FlyLight Robot ID: 3019156                            |
| Fig. 2, 3     | Chr = 20XUAS-CsChrimson (X)                        | RRID:BDSC_55134                                       |
| Fig. 2, 3     | 20XUAS-CsChrimson (II) for<br>Chr;RNAi experiments | RRID:BDSC_55136                                       |
| Fig. 2, 3     | Gt = 20XUAS-GtACR1 (III)                           | Rebecca Yang (Duke), A. Claridge-<br>Chang (Duke-NUS) |
| Fig. 2        | Akh-GAL4                                           | RRID:BDSC_25684                                       |
| Fig. 2        | AstA-GAL4                                          | RRID:BDSC_51979                                       |
| Fig. 2        | Crz-GAL4                                           | RRID:BDSC_51976                                       |
| Fig. 2        | DH44-GAL4                                          | RRID:BDSC_51987                                       |
| Fig. 2        | Lk-GAL4                                            | RRID:BDSC_51993                                       |
| Fig. 2        | NPF-GAL4                                           | RRID:BDSC_25682                                       |
| Fig. 2        | Proctolin-GAL4                                     | RRID:BDSC_51972                                       |
| Fig. 2        | sNPF-GAL4                                          | RRID:BDSC_51991                                       |
| Fig. 2        | Tk-GAL4                                            | RRID:BDSC_51973                                       |
| Fig. 2        | TH-GAL4 (ple-GAL4)                                 | RRID:BDSC_8848                                        |
| Fig. 2        | (PPL1) MB504B-GAL4                                 | RRID:BDSC_68329                                       |
| Fig. 2        | (PPL1) MB065B-GAL4                                 | RRID:BDSC_68281                                       |
| Fig. 2        | (PAM) 58E02-GAL4                                   | RRID:BDSC_41347                                       |
| Fig. 2        | Tdc-GAL4                                           | RRID:BDSC_9313                                        |

|           |                                                                                 |                                         |
|-----------|---------------------------------------------------------------------------------|-----------------------------------------|
| Fig. 2    | Trh-GAL4                                                                        | RRID:BDSC_38388                         |
| Fig. 2    | (PPL1- $\gamma$ 2 $\alpha$ '1) MB296B-GAL4 <sup>1,2</sup>                       | RRID:BDSC_68308                         |
| Fig. 2    | (PPL1- $\alpha$ 3) MB630B-GAL4 <sup>2</sup>                                     | RRID:BDSC_68334                         |
| Fig. 2    | (PPL1- $\gamma$ 1-pedc) MB320C-GAL4 <sup>2</sup>                                | RRID:BDSC_68253                         |
| Fig. 2    | (PPL1- $\alpha$ '2 $\alpha$ 2) MB058B-GAL4 <sup>1</sup>                         | RRID:BDSC_68278                         |
| Fig. 2    | (PPL1- $\alpha$ '2 $\alpha$ 2, $\gamma$ 2 $\alpha$ '1) MB099C-GAL4 <sup>2</sup> | RRID:BDSC_68290                         |
| Fig. 2    | (PAM- $\alpha$ 1) MB043C-GAL4 <sup>1,2</sup>                                    | RRID:BDSC_68363                         |
| Fig. 2    | (PAM- $\beta$ 1) MB063B-GAL4 <sup>1,2</sup>                                     | RRID:BDSC_68248                         |
| Fig. 2    | (PAM- $\beta$ 1 $\beta$ 2) MB213B-GAL4 <sup>1,2</sup>                           | RRID:BDSC_68273                         |
| Fig. 2    | (PAM- $\gamma$ 5) MB315C-GAL4 <sup>1,2</sup>                                    | RRID:BDSC_68316                         |
| Fig. 2    | (PAM- $\beta$ '2a) MB109B-GAL4 <sup>1,2</sup>                                   | RRID:BDSC_68261                         |
| Fig. 2    | (PAM- $\gamma$ 4, $\gamma$ 4< $\gamma$ 1 $\gamma$ 2) MB312C-GAL4 <sup>1</sup>   | RRID:BDSC_68252                         |
| Fig. 2    | (PAM- $\gamma$ 3) MB441B-GAL4 <sup>1</sup>                                      | RRID:BDSC_68251                         |
| Fig. 2    | (all KC) MB010B-GAL4 <sup>1</sup>                                               | FlyLight Robot ID: 2135061              |
| Fig. 2    | ( $\alpha$ / $\beta$ KC) MB008B-GAL4 <sup>1</sup>                               | FlyLight Robot ID: 2135059              |
| Fig. 2    | ( $\alpha$ / $\beta$ KC) c739-GAL4                                              | RRID:BDSC_7362                          |
| Fig. 2    | ( $\alpha$ '/ $\beta$ ' KC) MB005B-GAL4 <sup>1</sup>                            | FlyLight Robot ID: 2135056              |
| Fig. 2    | ( $\gamma$ -m KC) MB131B-GAL4 <sup>1</sup>                                      | FlyLight Robot ID: 2135179              |
| Fig. 2    | (FBI4,6) ss20-GAL4 (III)                                                        | L. Shao, U. Heberlein, FlyLight         |
| Fig. 2    | (FBI4,6) ss208-GAL4 (III)                                                       | T. Wolff, A. Jenett, G. Rubin, FlyLight |
| Fig. 2    | (FBI4,6) ss225-GAL4 (III)                                                       | T. Wolff, A. Jenett, G. Rubin, FlyLight |
| Fig. 2, 3 | (FBI6) c205-GAL4                                                                | RRID:BDSC_30826                         |
| Fig. 2    | (FBI2,8,9) 89E07-GAL4 <sup>3</sup>                                              | RRID:BDSC_40553                         |

|           |                                        |                           |
|-----------|----------------------------------------|---------------------------|
| Fig. 2    | (FBI5,8,9) 38E07-GAL4 <sup>3</sup>     | RRID:BDSC_50007           |
| Fig. 2    | (ventral FB) 58F03-GAL4                | RRID:BDSC_39187           |
| Fig. 2    | (FBI1,2) 52G12-GAL4                    | RRID:BDSC_49581           |
| Fig. 2, 3 | UAS-Valium                             | RRID:BDSC_35786           |
| Fig. 2, 3 | UAS-Lk-RNAi <sup>4, 5, 6, 7</sup>      | RRID:BDSC_25798           |
| Fig. 2, 3 | UAS-Lkr-RNAi <sup>4, 6, 8</sup>        | RRID:BDSC_25936           |
| Fig. 2, 3 | UAS-AstA-RNAi <sup>7, 9</sup>          | RRID:BDSC_25866           |
| Fig. 2, 3 | UAS-AstA-R1-RNAi <sup>10</sup>         | RRID:BDSC_27280           |
| Fig. 2, 3 | UAS-NPF-RNAi <sup>7, 11, 12</sup>      | RRID:BDSC_27237           |
| Fig. 2, 3 | UAS-NPFR-RNAi <sup>6, 12, 13, 14</sup> | RRID:BDSC_25939           |
| Fig. 2, 3 | UAS-DH44-RNAi <sup>7, 15, 16</sup>     | RRID:BDSC_25804           |
| Fig. 2, 3 | UAS-DH44-R1-RNAi <sup>15</sup>         | RRID:BDSC_28780           |
| Fig. 2, 3 | UAS-Dop1R1-RNAi <sup>14</sup>          | RRID:BDSC_62193           |
| Fig. 2, 3 | UAS-Dop1R2-RNAi <sup>14</sup>          | RRID:BDSC_65997           |
| Fig. 2, 3 | UAS-Dop2R-RNAi <sup>14</sup>           | RRID:BDSC_26001           |
| Fig. 2, 3 | UAS-DopEcR-RNAi <sup>14</sup>          | RRID:BDSC_31981           |
| Fig. 3    | (FBI6) 84C10-LexA                      | RRID:BDSC_54339           |
| Fig. 3    | 8XLexAop-GAL80                         | RRID:BDSC_32213           |
| Fig. 4    | (FBI6) 84C10-GAL4                      | RRID:BDSC_48378           |
| Fig. 4    | UAS-GCaMP6f;UAS-tdTomato               | D. Clark, Yale University |

14 **Supplementary Table 3**

15 Detailed statistics and sample size for data in supplementary figures

| Figure            | Datasets compared                                                                                                                                      | Statistics                                                                                               |
|-------------------|--------------------------------------------------------------------------------------------------------------------------------------------------------|----------------------------------------------------------------------------------------------------------|
| Suppl.<br>Fig. 1d | <b>w1118 100 mM sucrose,</b><br>2h (n=20), 6 h (n=10), 21 h (n=20)<br><br>Slope -0.1652<br>SE of slope -0.06535<br>95% CI of slope -0.03372 to -0.2966 | One-way ANOVA,<br>F(2,47)=3.53, p=0.0372<br><br>Test for linear trend:<br>F(1, 47)=6.39, <b>p=0.0149</b> |
| Suppl.<br>Fig. 1f | <b>CS 50 mM sucrose</b><br><br><b>5 h (n=12), 21 h (n=12)</b>                                                                                          | Two-tailed Unpaired t test<br><br>t=2.611, df=22, <b>p=0.016</b>                                         |
| Suppl.<br>Fig. 1j | w1118 transitions per fly<br>first half vs. second half (n=201)                                                                                        | Two-tailed Paired t test<br><br>t=-0.84, df=200, p=0.4004                                                |
| Suppl.<br>Fig. 2b | Lk % ate<br><br><b>Lk&gt;Chr (n=10) vs. Lk&gt;Chr;Lk-RNAi (n=20)</b>                                                                                   | Two-tailed Mann-Whitney t<br>test<br><br><b>p&lt;0.0001</b>                                              |
| Suppl.<br>Fig. 3b | 84C10-GAL4 left panel                                                                                                                                  | One-way ANOVA,<br>F(3,50)=7.82, <b>p=0.0002</b>                                                          |
|                   |                                                                                                                                                        | Sidak's adjusted p:                                                                                      |
|                   | 84C10>Valium (n=17) vs. 84C10>Chr (n=17)                                                                                                               | 0.1463                                                                                                   |
|                   | <b>84C10&gt;Valium (n=10) vs. 84C10&gt;Gt (n=10)</b>                                                                                                   | <b>0.0034</b>                                                                                            |
|                   | 84C10-GAL4 right panel                                                                                                                                 | One-way ANOVA,<br>F(3,28)=5.02, <b>p=0.0066</b>                                                          |
|                   | Dunnett's adjusted p:                                                                                                                                  |                                                                                                          |
|                   | <b>RNAi ctrl (n=8) vs. AstA-R1<sup>RNAi</sup> (n=10)</b>                                                                                               | <b>0.0069</b>                                                                                            |

|                   |                                                                                                  |                                                                   |
|-------------------|--------------------------------------------------------------------------------------------------|-------------------------------------------------------------------|
|                   | <b>RNAi ctrl (n=8) vs. DH44-R1<sup>RNAi</sup> (n=9)</b>                                          | <b>0.0417</b>                                                     |
|                   | <b>RNAi ctrl (n=8) vs. Lkr<sup>RNAi</sup> (n=5)</b>                                              | <b>0.0078</b>                                                     |
| Suppl.<br>Fig. 3c | 84C10-GAL4 % ate                                                                                 | One-way ANOVA,<br>F(3,55)=186.1, <b>p&lt;0.0001</b>               |
|                   |                                                                                                  | Sidak's adjusted p:                                               |
|                   | <b>deprived 84C10&gt;Chr (n=17) vs. fed 84C10&gt;Chr (n=15)</b>                                  | <b>&lt;0.0001</b>                                                 |
|                   | <b>deprived 84C10&gt;Gt (n=20) vs. fed 84C10&gt;Gt (n=7)</b>                                     | <b>&lt;0.0001</b>                                                 |
| Suppl.<br>Fig. 3d | 84C10-GAL4 Place PI<br>84C10>w1118 (n=8), 84C10>Chr (n=12)<br>84C10>w1118 (n=7), 84C10>Gt (n=12) | One-way ANOVA,<br>F(3,35)=1.95, p=0.1389                          |
| Suppl.<br>Fig. 4b | 84C10 Peak $\Delta R/R_0$ prior sweet experience<br>sweet vs. bittersweet (n=5)                  | Two-tailed Paired t test<br>t=0.5381, df=4, p=0.6191              |
| Suppl.<br>Fig. 4d | 84C10 Peak $\Delta R/R_0$ prior bittersweet experience<br>sweet vs. bittersweet (n=7)            | Two-tailed Paired t test :<br>t=1.258, df=6, p=0.2552             |
| Suppl.<br>Fig. 5a | Preference index                                                                                 | One-way ANOVA,<br>F(2,22)=7.41, p=0.0035<br>Dunnett's adjusted p: |
|                   | empty>Chr (n=5) vs. c205>Chr (n=10)                                                              | 0.0634                                                            |
|                   | empty>Chr (n=5) vs. 84C10>Chr (n=10)                                                             | 0.4417                                                            |



|                   |                                       |                                                                |
|-------------------|---------------------------------------|----------------------------------------------------------------|
| Suppl.<br>Fig. 5b | Preference index left panel           | One-way ANOVA,<br>F(3,8)=4.37, p=0.0424<br>Sidak's adjusted p: |
|                   | c205>w1118 (n=3) vs. c205>Chr (n=3)   | 0.1867                                                         |
|                   | 84C10>w1118 (n=3) vs. 84C10>Chr (n=3) | 0.0873                                                         |
|                   | Preference index left panel (n=3)     | One-way ANOVA,<br>F(3,8)=0.81, p=0.52                          |

**Supplementary Figure 1**

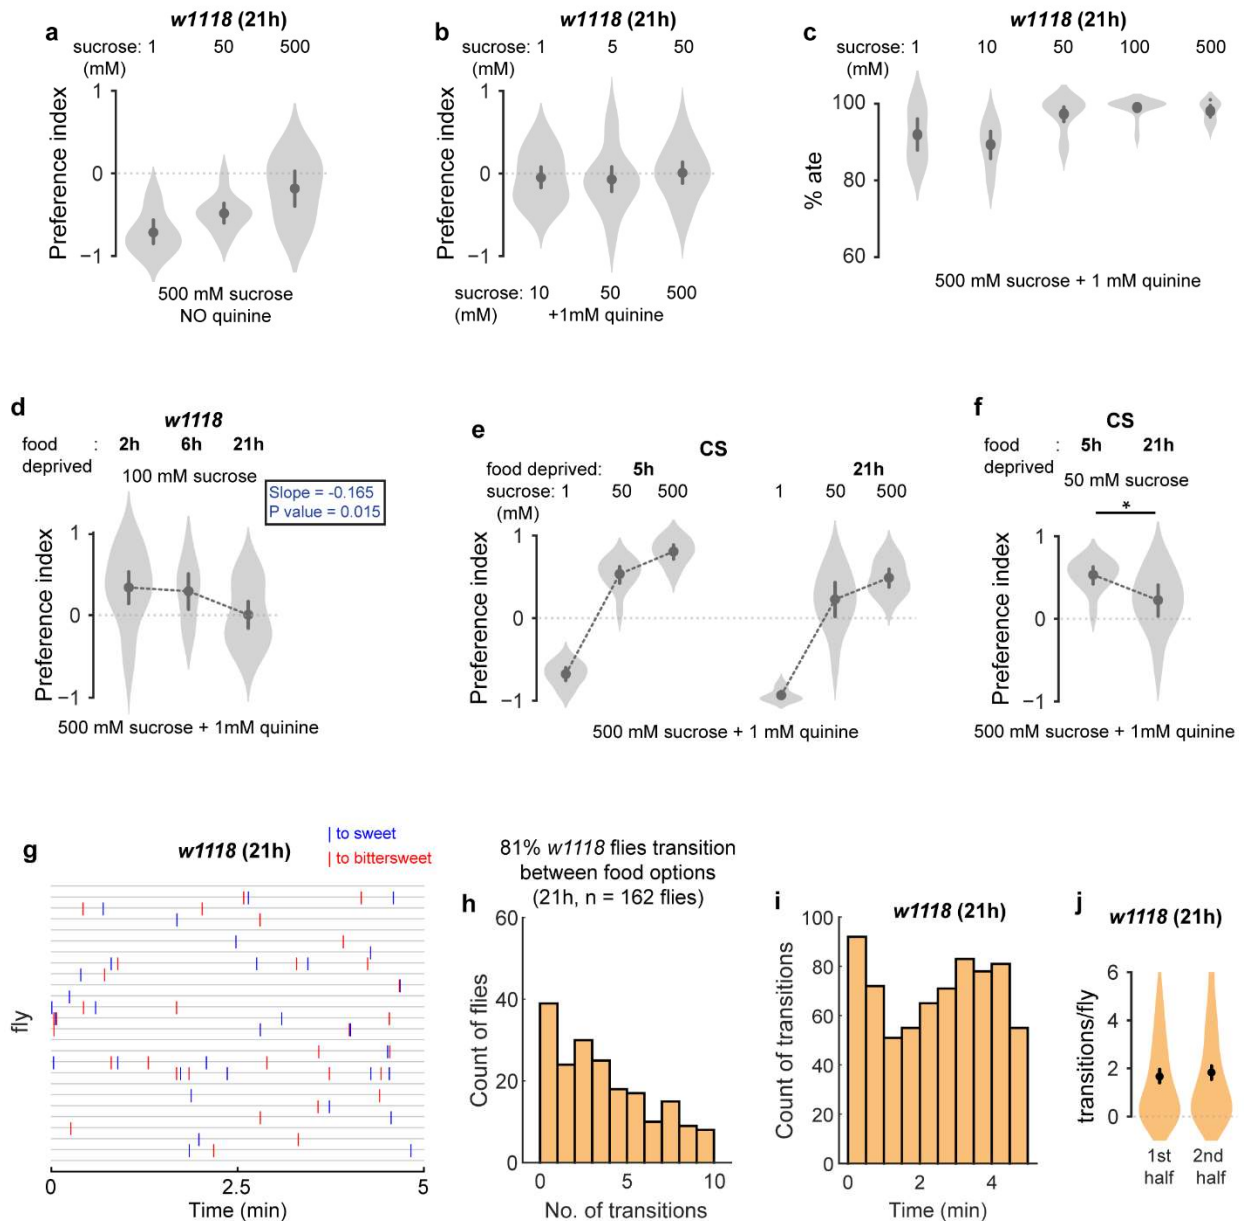

16

17 **Supplementary Figure 1. Food content and hunger affect food preference.** **a** *w1118* flies  
18 always preferred higher sucrose concentration when no quinine was present (n = 10 each). **b**  
19 Food preference depended on sucrose concentration ratio between the two food options when  
20 quinine concentration was kept constant (n = 24 each). **c** Most *w1118* flies ate after 21 h food  
21 deprivation, with almost 100% eating at the equal-preference 50 mM sucrose condition (n = 10

22 each except 50 mM n = 20, 100 mM n = 27). **d** Food preference in *w1118* flies shifted from  
23 sweet to equal-preference for sweet and bittersweet as food deprivation duration increased from  
24 2 – 21 h at 100 mM sucrose vs. 500 mM sucrose + 1 mM quinine. A linear downward trend from  
25 2 h to 21 h was statistically significant. **e** CS flies also showed shift in food preference at equal  
26 preference condition (50 mM sucrose vs. 500 mM sucrose + 1 mM quinine) with varying food  
27 deprivation duration (n = 12 each). **f** At equal-preference condition, CS flies preferred sweet  
28 after 5 h food deprivation while they showed equal-preference for sweet and bittersweet after 21  
29 h food deprivation. **g** *w1118* fly tracking during decision task at equal-preference condition (50  
30 mM sucrose vs. 500 mM sucrose + 1 mM quinine) showed that flies transitioned from one food  
31 patch to the other and sampled both foods multiple times throughout the assay. X-axis depicts  
32 time during the assay and y-axis shows single fly transitions over time from all flies during a  
33 sample trial. Blue depicts transition from bittersweet to sweet patch, while red depicts transition  
34 from sweet to bittersweet patch. **h** Histogram of number of flies that made a certain number of  
35 transitions. 81% of flies made at least one transition, while majority of flies (69%) made at least  
36 2 transitions during the decision task. **i** Histogram of number of transitions made over time  
37 during the decision task. Flies transitioned throughout the task with **j** no significant difference  
38 between the number of transitions per fly during the first and the second half of the task. Plots  
39 depict mean  $\pm$  95% CI; violins show data distribution. See Supplementary Table 3 for statistics  
40 and sample size.  $p < 0.01 = **$ ,  $p < 0.05 = *$ . Non-significant differences are not depicted in figures.

**Supplementary Figure 2**

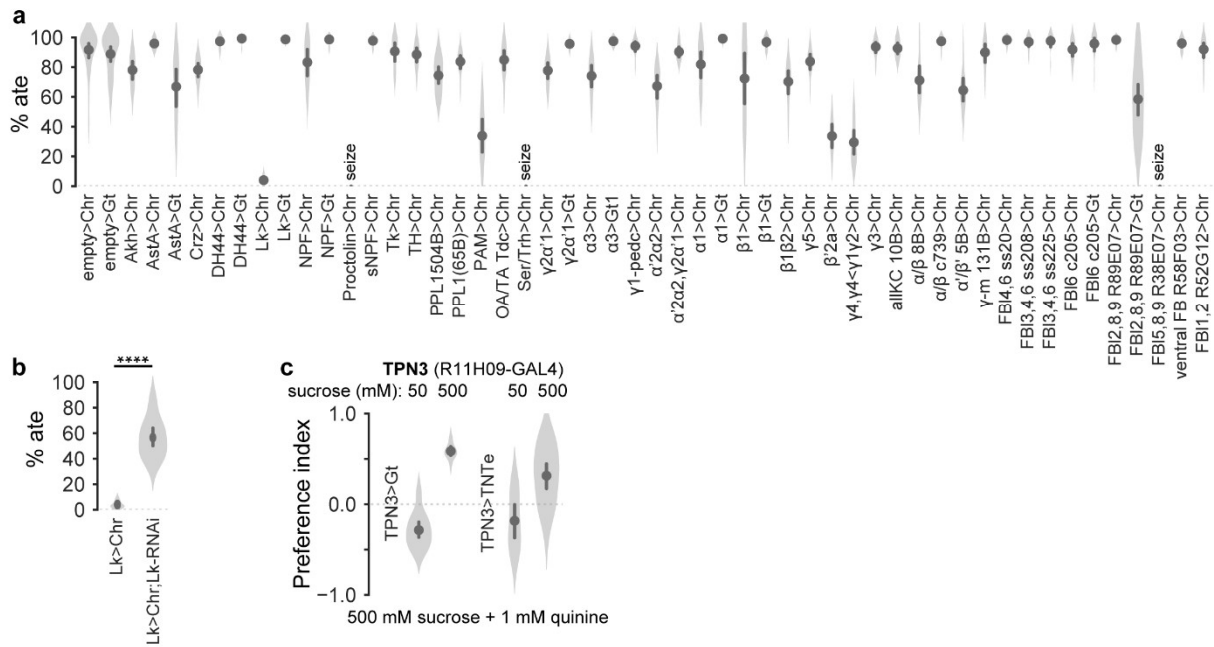

41

42 **Supplementary Figure 2. Percentage of flies that ate during decision assay.** **a** Percent of flies

43 that ate during the optogenetic screen for all the genotypes tested. *n* is the same as in Figure 2a. **b**

44 Only ~4% of the flies ate when Lk neurons were activated (Lk>Chr) and this effect was

45 abolished (~57% ate) by knocking down Lk in the same neurons during optogenetic activation

46 (Lk>Chr;Lk-RNAi). **c** Acute optogenetic (TPN3>Gt) and chronic inhibition (TPN3>TNTe) of

47 second-order taste projection neurons (TPN3) did not change food preference at the equal-

48 preference condition (50 mM, *n* for Gt = 20, *n* for TNTe = 10) or when sucrose concentration

49 was the same in both sweet and bittersweet options (500 mM, *n* for Gt = 10, *n* for TNTe = 20).

50 Plots depict mean ± 95% CI; violins show data distribution. See Supplementary Table 3 for

51 statistics and sample size.  $p < 0.0001 = ***$ .

### Supplementary Figure 3

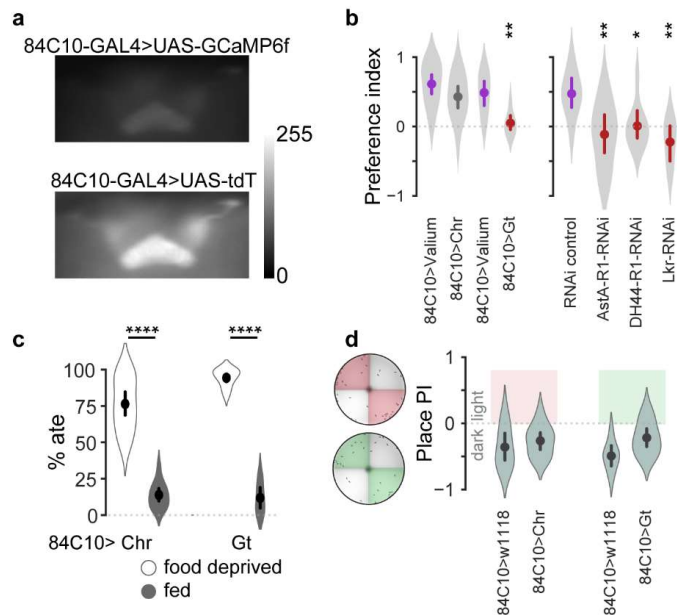

52

53 **Supplementary Figure 3. 84C10-GAL4 characterization.** **a** 84C10-GAL4 showed high

54 baseline GCaMP6f fluorescence. Images shown are raw fluorescence images from the same frame

55 without background subtraction. **b** 84C10-GAL4 had the same behavioral phenotype as c205-

56 GAL4 **b** (left) when optogenetically activated (84C10>Chr) and inhibited (84C10>Gt)

57 compared to appropriate controls. Flies preferred bittersweet food compared to control flies

58 when FB16 neurons were inhibited using 84C10-GAL4. **b** (right) Receptor RNAi knockdown of

59 AstA, DH44 and LK in FB16 neurons using 84C10-GAL4 had the same effect as with c205-

60 GAL4. Flies preferred more bittersweet compared to control upon receptor RNAi knockdown. **c**

61 Feeding was not initiated in fed flies and not inhibited in food-deprived flies on FB16 activation

62 or inhibition using 84C10-GAL4. **d** Neither activation nor inhibition of FB16 was inherently

63 rewarding or aversive since there was no significant difference in place preference without food

64 for illuminated vs. non-illuminated sectors of the arena. Plots depict mean  $\pm$  95% CI; violins

65 show data distribution. See Supplementary Table 3 for statistics and sample size.

66  $p < 0.00001 = ****$ ,  $p < 0.0001 = ***$ ,  $p < 0.01 = **$ ,  $p < 0.05 = *$ .

## Supplementary Figure 4

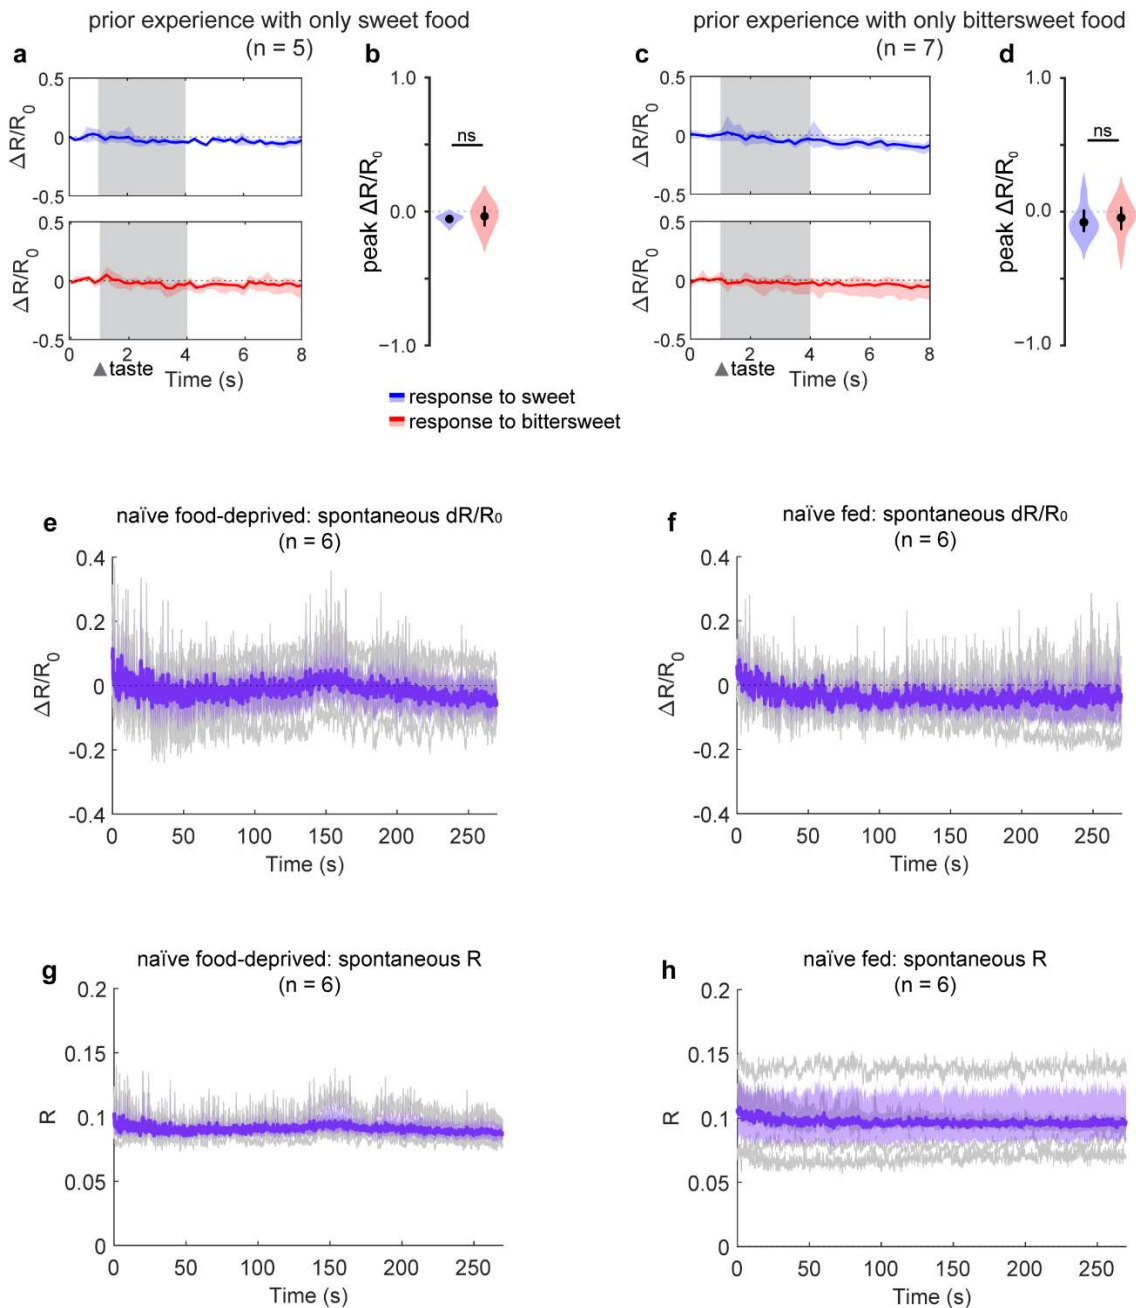

67

68 **Supplementary Figure 4. FBI6 neural activity is context-dependent.** **a** FBI6 ratiometric  
 69 calcium responses to sweet and bittersweet taste stimuli,  $\Delta R/R_0$ , of food-deprived flies that  
 70 experienced only sweet food prior to imaging. Gray background area represents taste application.  
 71 Calcium activity trace depicts mean  $\Delta R/R_0 \pm 95\%$  CI. **b** Peak  $\Delta R/R_0$  show no significant

72 difference between response to experienced sweet and new bittersweet food stimulus. **c** FBI6  
73 ratiometric calcium responses to sweet and bittersweet taste stimuli,  $\Delta R/R_0$ , of flies that  
74 experienced only bittersweet food prior to imaging. Gray background area represents taste  
75 application. Calcium activity trace depicts mean  $\Delta R/R_0 \pm 95\%$  CI. **d** Peak  $\Delta R/R_0$  show no  
76 significant difference between response to experienced bittersweet and new sweet food stimulus.  
77 **e** Spontaneous normalized FBI6 ratiometric calcium response,  $\Delta R/R_0$ , without any taste  
78 application in naïve food-deprived flies. **f** Spontaneous normalized FBI6 ratiometric calcium  
79 response,  $\Delta R/R_0$ , without any taste application in naïve fed flies. **g** Spontaneous FBI6 calcium  
80 response,  $R$ , without any taste application in naïve food-deprived flies. **h** Spontaneous FBI6  
81 ratiometric calcium response,  $R$ , without any taste application in naïve fed flies. Points on graphs  
82 depict mean  $\pm 95\%$  CI, with violins depicting full data distribution. See Supplementary Table 3  
83 for details on statistics and sample size).

## Supplementary Figure 5

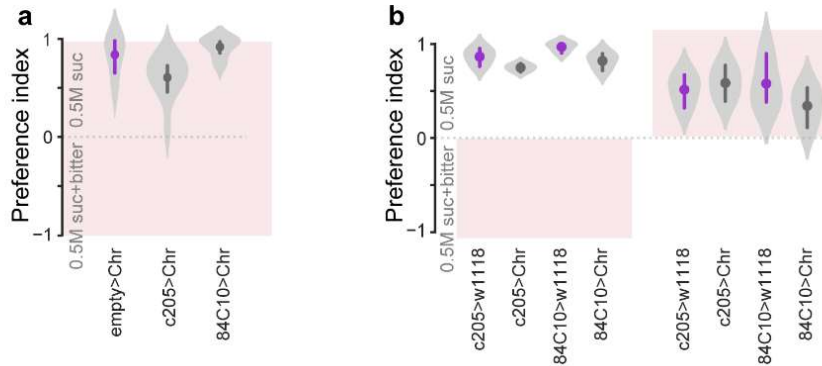

84

### 85 **Supplementary Figure 5. Activation of FB16 neurons in any context has no effect on food**

86 **preference. a** Optogenetically activating (c205>Chr and 84C10>Chr) FB16 neurons throughout

87 the food arena in food-deprived flies at the condition in which control flies had a strong

88 preference for sweet food (0.5 M sucrose vs. 0.5 M sucrose + 1 m M quinine) had no effect on

89 food preference. **b** Optogenetically activating (c205>Chr and 84C10>Chr) FB16 neurons on only

90 bittersweet food (left panel) in food-deprived flies at the condition in which control flies had a

91 strong preference for sweet food (0.5 M sucrose vs. 0.5 M sucrose + 1 m M quinine) had no

92 effect on food preference. Activating FB16 neurons on sweet food only also did not shift

93 preference in this condition (right panel). Plots depict mean  $\pm$  95% CI; violins show data

94 distribution. See Supplementary Table 3 for statistics and sample size.

95

### 96 **Supplementary References**

97 1. Aso Y, *et al.* The neuronal architecture of the mushroom body provides a logic for

98 associative learning. *Elife* **3**, e04577 (2014).

99



- 100 2. Aso Y, Rubin GM. Dopaminergic neurons write and update memories with cell-type-  
101 specific rules. *Elife* **5**, (2016).
- 102
- 103 3. Hu W, *et al.* Fan-Shaped Body Neurons in the Drosophila Brain Regulate Both Innate  
104 and Conditioned Nociceptive Avoidance. *Cell Rep* **24**, 1573-1584 (2018).
- 105
- 106 4. Cavey M, Collins B, Bertet C, Blau J. Circadian rhythms in neuronal activity propagate  
107 through output circuits. *Nat Neurosci* **19**, 587-595 (2016).
- 108
- 109 5. Murphy KR, *et al.* Postprandial sleep mechanics in Drosophila. *Elife* **5**, (2016).
- 110
- 111 6. Senapati B, *et al.* A neural mechanism for deprivation state-specific expression of  
112 relevant memories in Drosophila. *Nat Neurosci* **22**, 2029-2039 (2019).
- 113
- 114 7. Lee JH, Bassel-Duby R, Olson EN. Heart- and muscle-derived signaling system  
115 dependent on MED13 and Wingless controls obesity in Drosophila. *Proc Natl Acad Sci U*  
116 *SA* **111**, 9491-9496 (2014).
- 117
- 118 8. Zandawala M, *et al.* Modulation of Drosophila post-feeding physiology and behavior by  
119 the neuropeptide leucokinin. *PLoS Genet* **14**, e1007767 (2018).
- 120

- 121 9. Schiemann R, Lammers K, Janz M, Lohmann J, Paululat A, Meyer H. Identification and  
122 In Vivo Characterisation of Cardioactive Peptides in *Drosophila melanogaster*. *Int J Mol*  
123 *Sci* **20**, (2018).
- 124
- 125 10. Yu Y, *et al.* Regulation of starvation-induced hyperactivity by insulin and glucagon  
126 signaling in adult *Drosophila*. *Elife* **5**, (2016).
- 127
- 128 11. Guevara A, Gates H, Urbina B, French R. Developmental Ethanol Exposure Causes  
129 Reduced Feeding and Reveals a Critical Role for Neuropeptide F in Survival. *Front*  
130 *Physiol* **9**, 237 (2018).
- 131
- 132 12. Ameku T, *et al.* Midgut-derived neuropeptide F controls germline stem cell proliferation  
133 in a mating-dependent manner. *PLoS Biol* **16**, e2005004 (2018).
- 134
- 135 13. Tsao CH, Chen CC, Lin CH, Yang HY, Lin S. *Drosophila* mushroom bodies integrate  
136 hunger and satiety signals to control innate food-seeking behavior. *Elife* **7**, (2018).
- 137
- 138 14. Klose M, Shaw P. Sleep-drive reprograms clock neuronal identity through CREB-binding  
139 protein induced PDFR expression. *bioRxiv*, 2019.2012.2012.874628 (2019).
- 140
- 141 15. King AN, *et al.* A Peptidergic Circuit Links the Circadian Clock to Locomotor Activity.  
142 *Curr Biol* **27**, 1915-1927 e1915 (2017).

143

- 144 16. Cannell E, Dornan AJ, Halberg KA, Terhzaz S, Dow JAT, Davies SA. The corticotropin-  
145 releasing factor-like diuretic hormone 44 (DH44) and kinin neuropeptides modulate  
146 desiccation and starvation tolerance in *Drosophila melanogaster*. *Peptides* **80**, 96-107  
147 (2016).
